# Supplementary material
Source: MDPI journal article supplement (https://www.mdpi.com/2073-4433/14/9/1430)
Supplement: s1 [file s1]

# Supplementary Materials:

Eleftheria Ioannidou<sup>1,\*</sup>, Stefanos Papagiannis<sup>2,3,4</sup>, Manousos Ioannis Manousakas<sup>2,5</sup>, Chrysoula Betsou<sup>1,6</sup>, Konstantinos Eleftheriadis<sup>2</sup>, Jussi Paatero<sup>7</sup>, Lambrini Papadopoulou<sup>8</sup> and Alexandra Ioannidou<sup>1</sup>

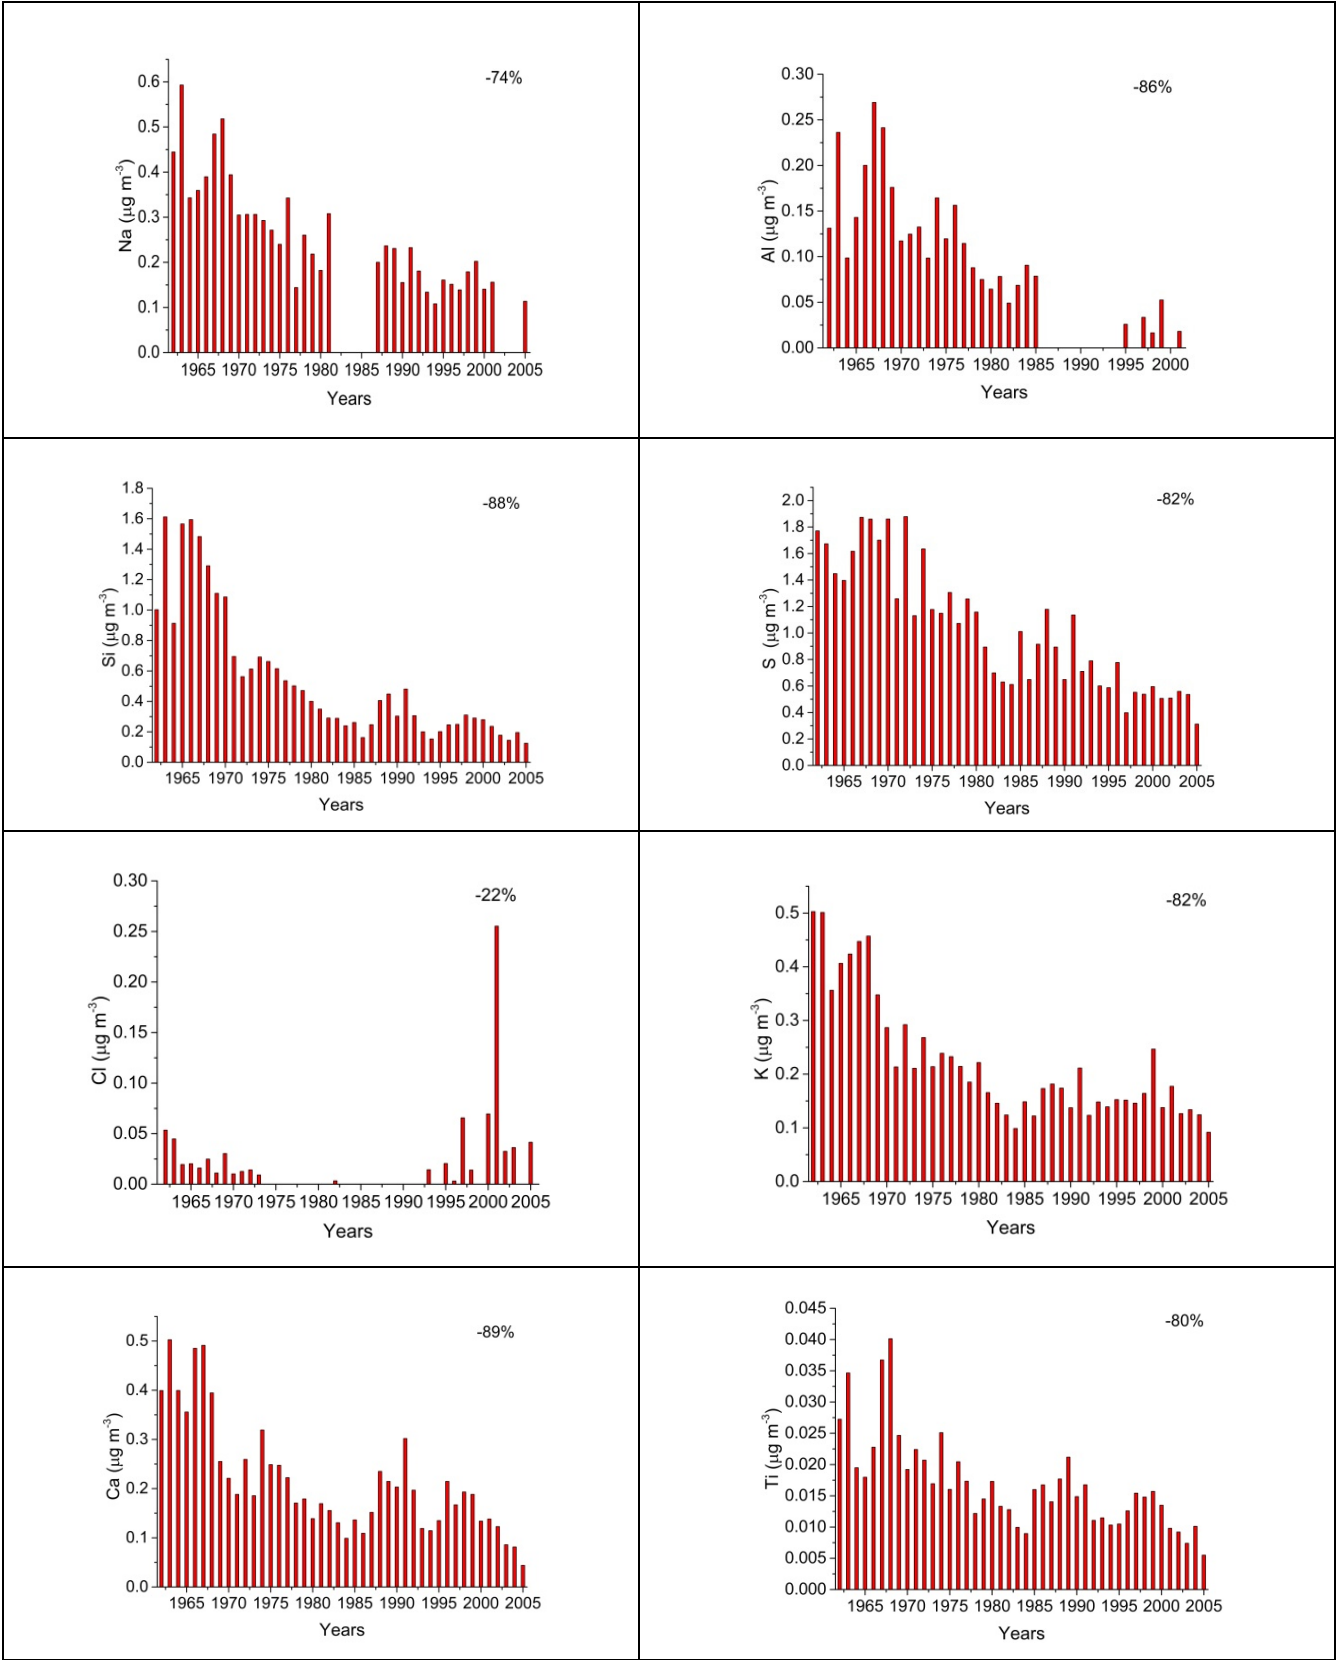

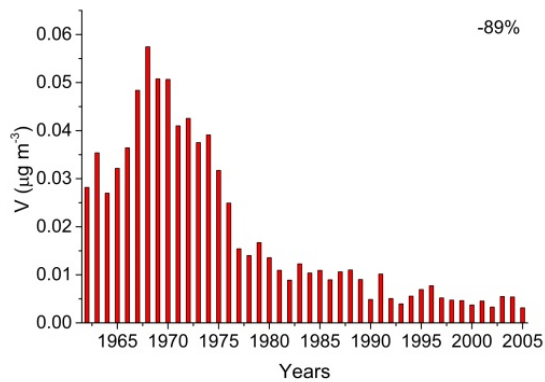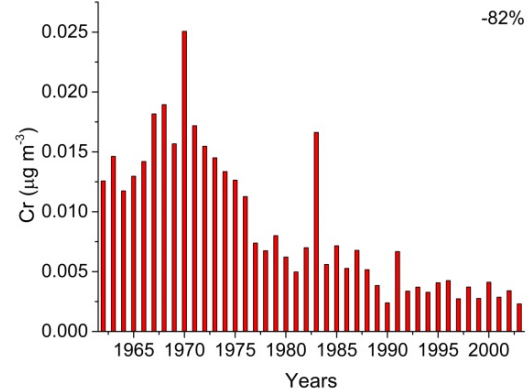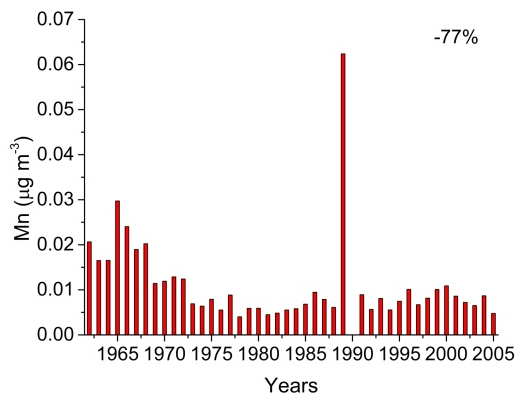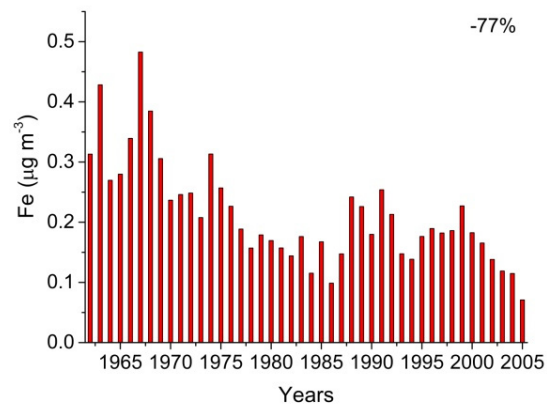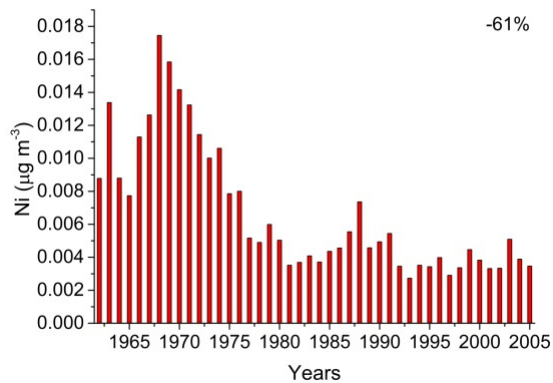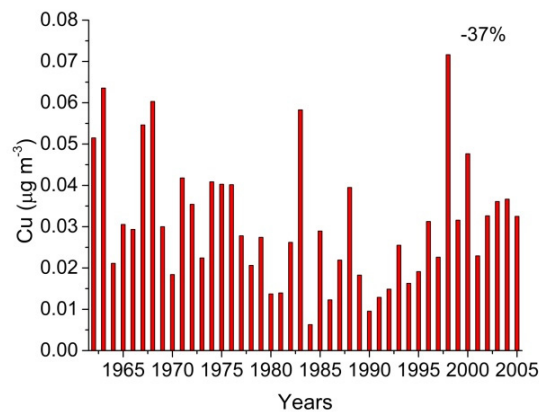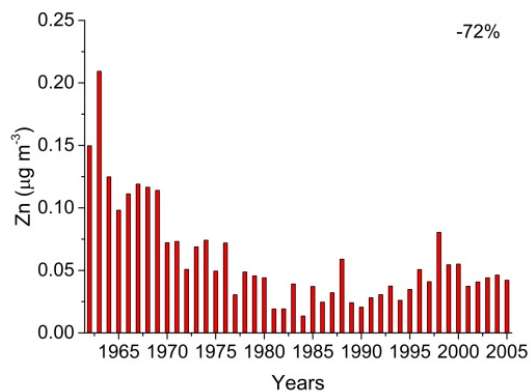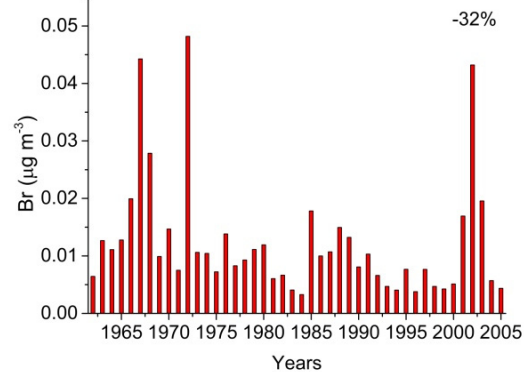

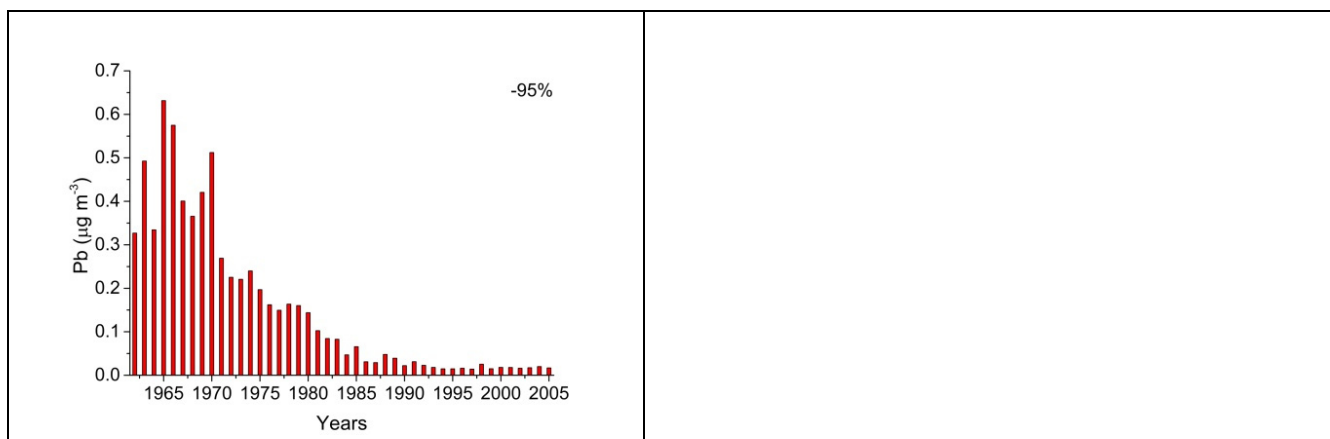

**Figure S1.** The Annual average concentrations of 17 chemical elements (Na, Al, Si, S, Cl, K, Ca, Ti, V, Cr, Mn, Fe, Ni, Cu, Zn, Br, Pb), in  $\mu\text{g m}^{-3}$  at Helsinki station (FMI). In the right corner of each diagram is noted the percentage reduction of each element.

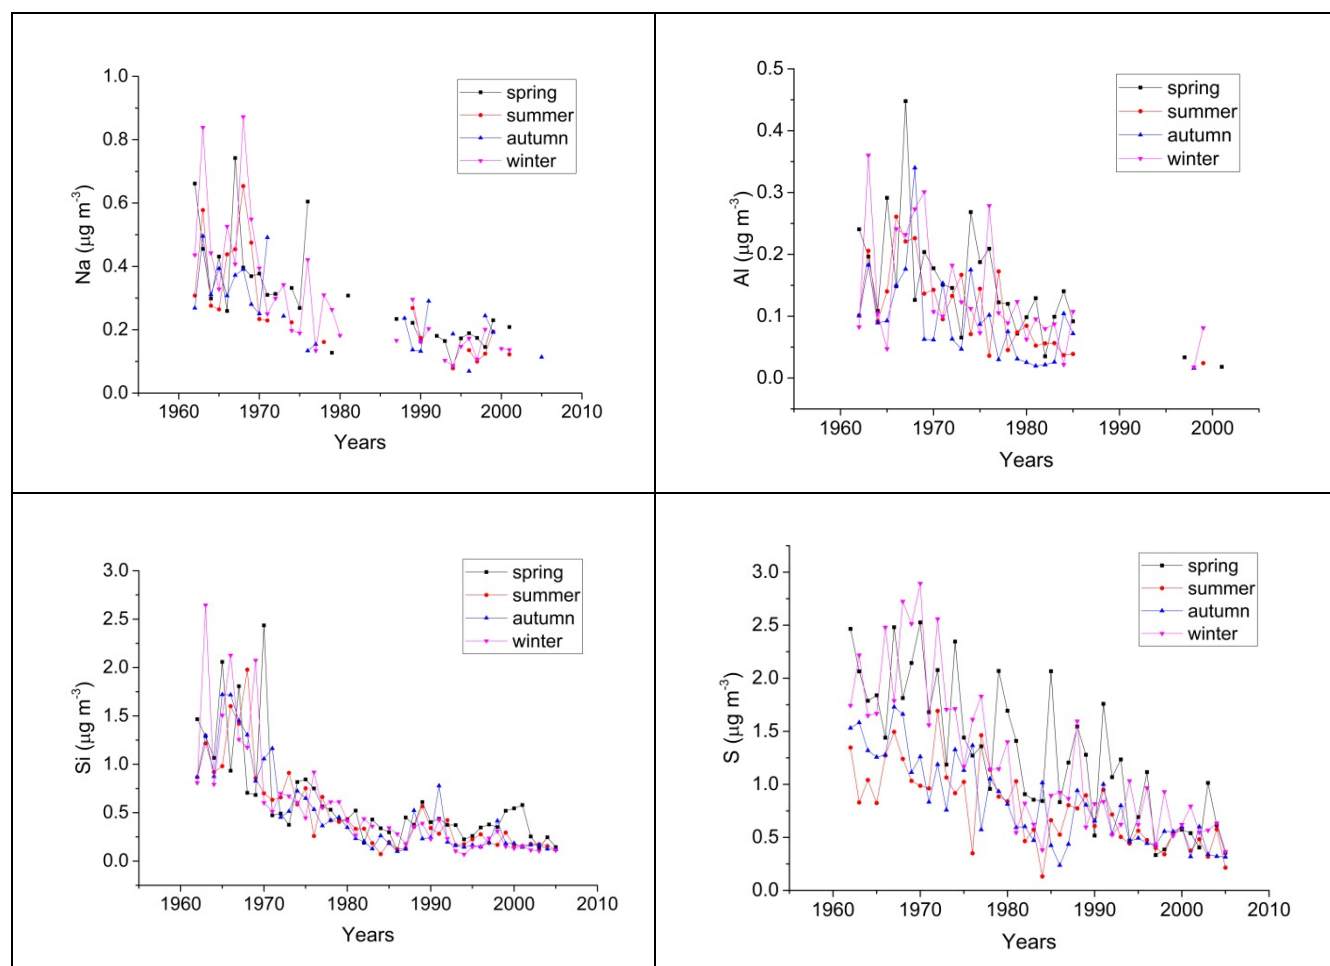

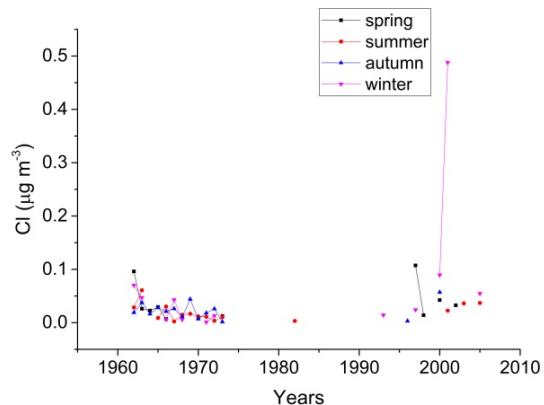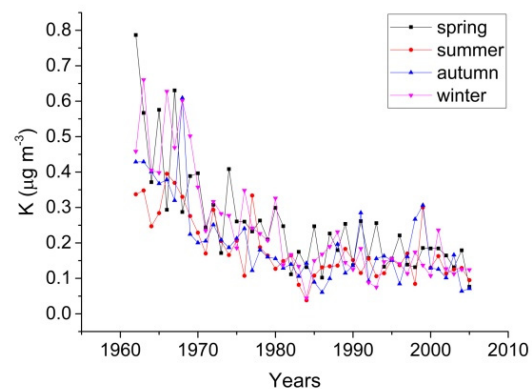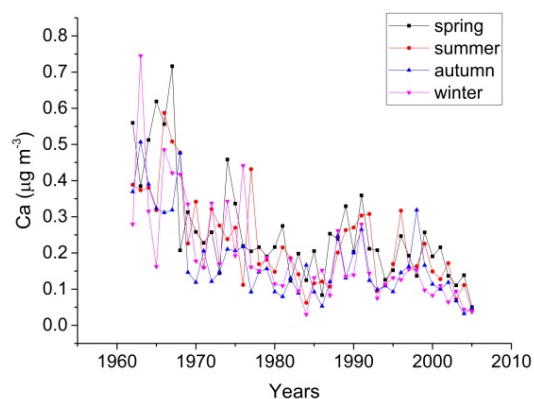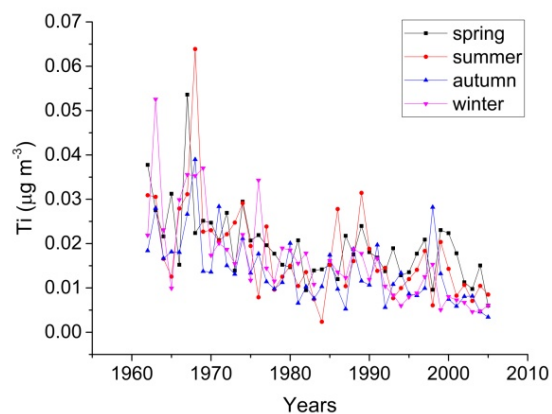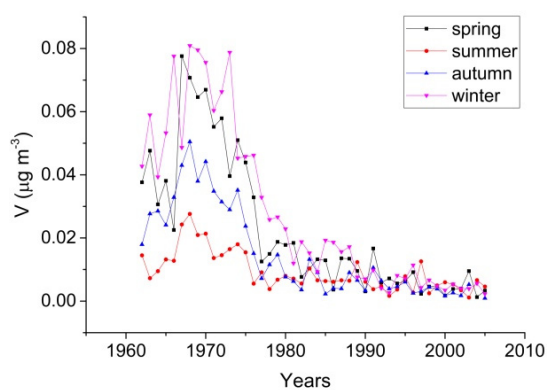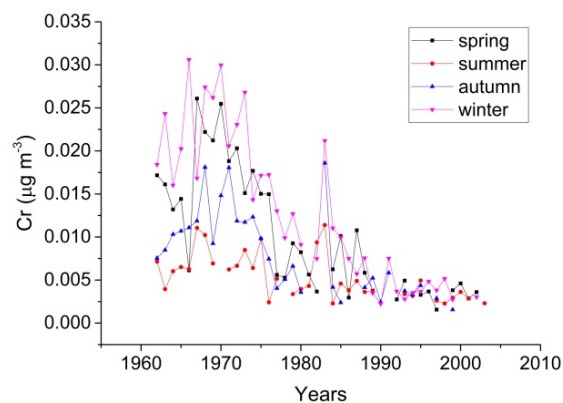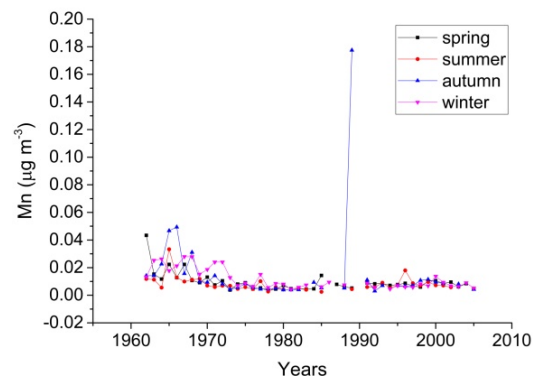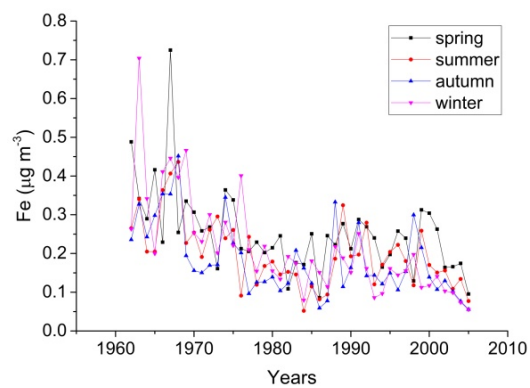

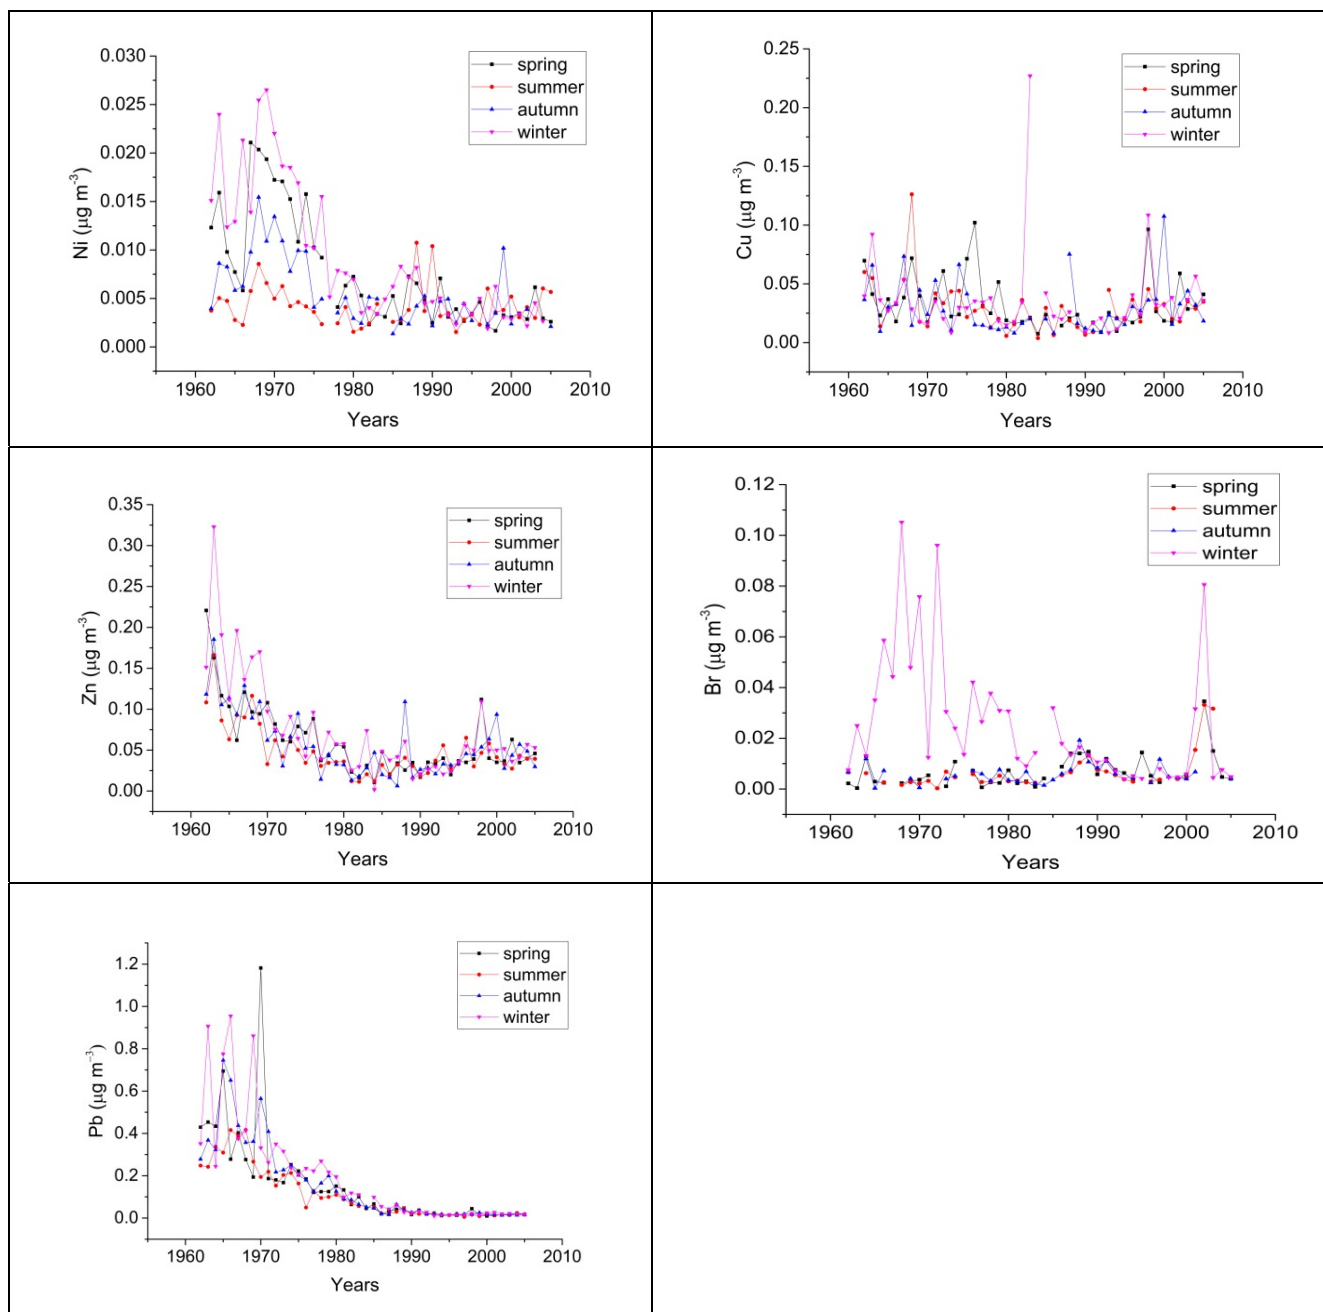

**Figure S2.** Average values of seasonal concentrations of trace elements, in  $\mu\text{g m}^{-3}$ , through the years.
